# Supplementary material for: Fecal Transplantation Treatment of Antibiotic-Induced, Noninfectious Colitis and Long-Term Microbiota Follow-Up
Source: Hindawi journal article supplement (doi:10.1155/2014/913867), 2014-01-01
Supplement: f1 [file 913867.f1.pdf]

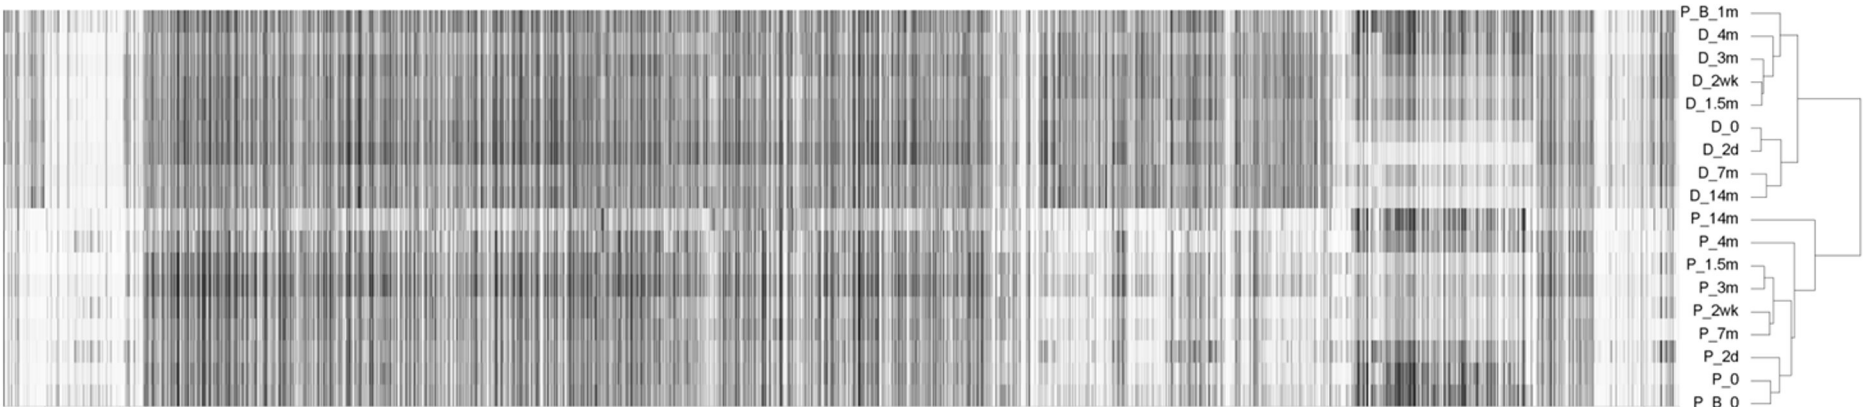

Actinobacteria

Bacilli

Bacteroidetes

Clostridium cluster I  
Clostridium cluster III

Clostridium cluster IV

Clostridium cluster IX  
Clostridium cluster XI  
Clostridium cluster XIII

Clostridium cluster XIVa

Clostridium cluster XV

Proteobacteria

Uncultured Clostridiales

Verrucomicrobia
